# Supplementary material
Source: publisher site journal article supplement (https://www.dovepress.com/article/286866)
Supplement: Supplementary file 1 [file get_supplementary_file.php]

**
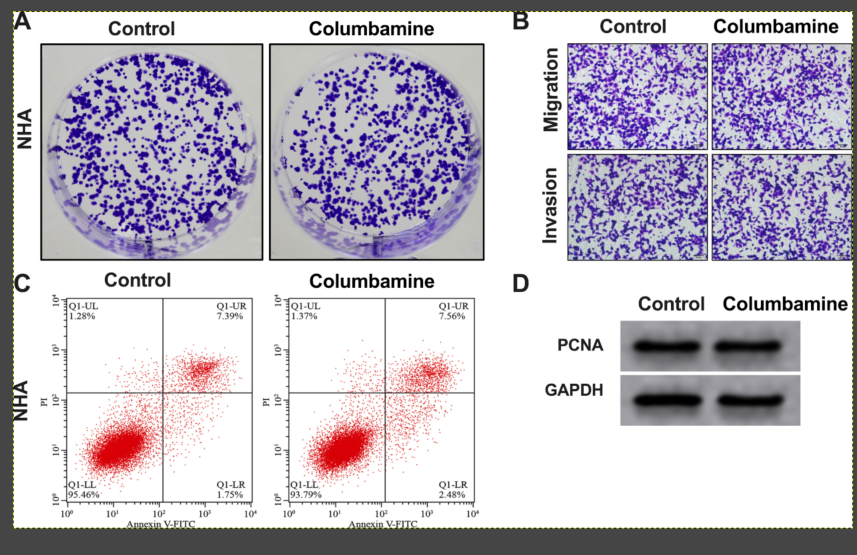
**

**Figure S1 The effect of columbamine on the development of NHA cells. A.** The proliferation of NHA cells was detected. **B.** The migration and invasion ability of NHA cells was detected by transwell. **C.** The apoptosis level of NHA cells was explored by flow cytometry. **D.** The protein level of PCNA was detected in NHA cells.
